# Supplementary material for: Safety assessment of new nanodiamonds@corrole hybrids addressed by the response of RAW-264.7 macrophages
Source: Royal Society of Chemistry journal article supplement (doi:10.1039/d2tb01863b), 2022-12-20
Supplement: d2tb01863b1.pdf [file d2tb01863b1.pdf]

## Electronic Supplementary Information

### Safety assessment of new nanodiamonds@corrole hybrids addressed by the response of Raw264.7 macrophages

Carla I.M.Santos,<sup>a,b\*</sup> Mónica Cicuéndez,<sup>c</sup> Gil Gonçalves,<sup>d,e</sup> Laura Rodríguez-Pérez,<sup>f</sup> M. Teresa Portolés,<sup>g,h</sup> M. Amparo F. Faustino,<sup>b</sup> M. Ángeles Herranz,<sup>f</sup> M. Graça P. M. S. Neves,<sup>b</sup> José M. G. Martinho,<sup>a</sup> Ermelinda M. S. Maçôas,<sup>a</sup> Nazario Martín<sup>f\*</sup>

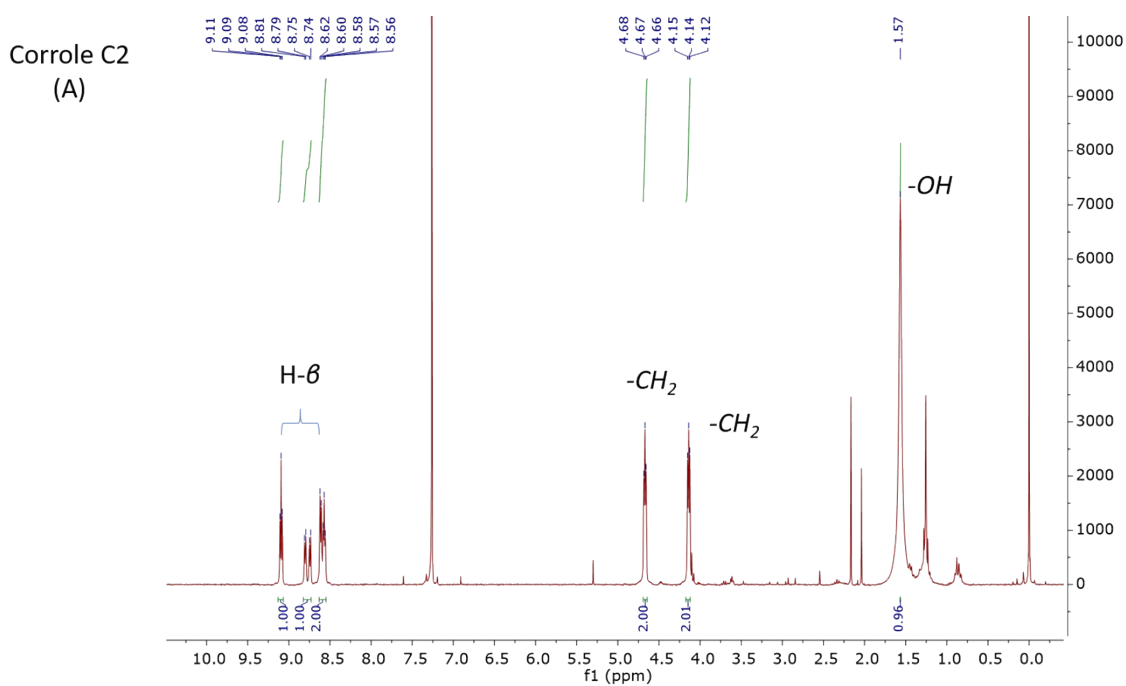

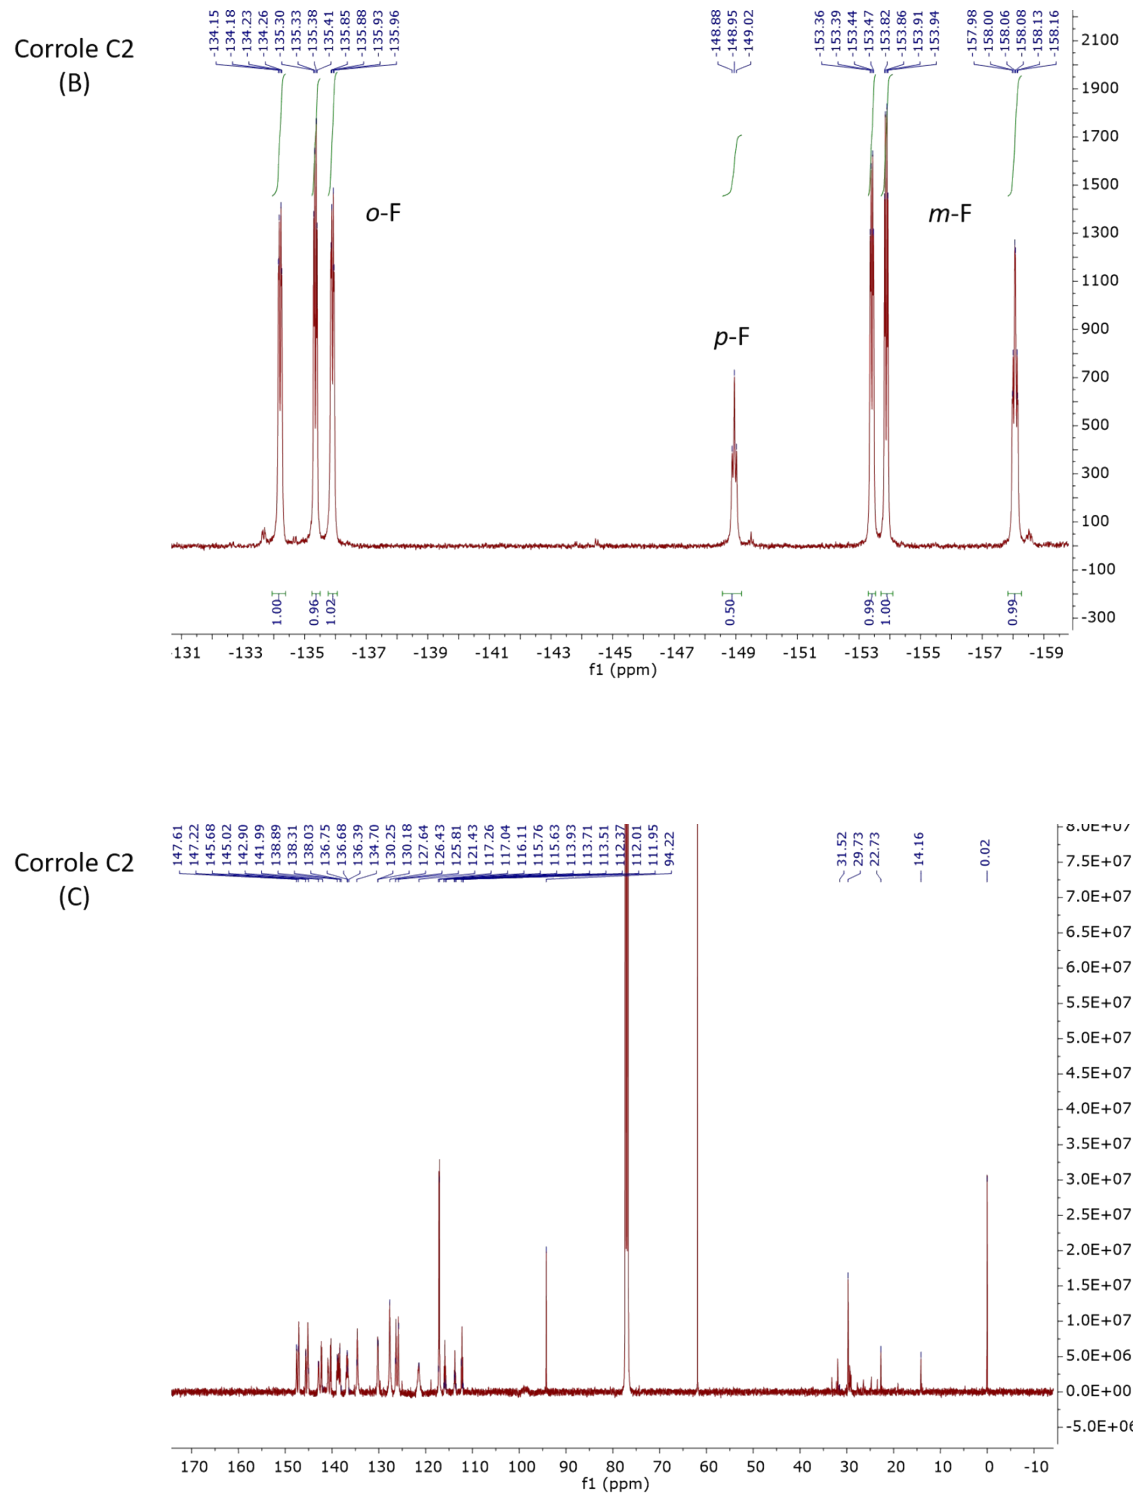

**Figure S1.**  $^1\text{H}$  NMR (A),  $^{19}\text{F}$  NMR (B) and  $^{13}\text{C}$  NMR (C) spectra of corrole **C**<sub>2</sub> in  $\text{CDCl}_3$ .

A)

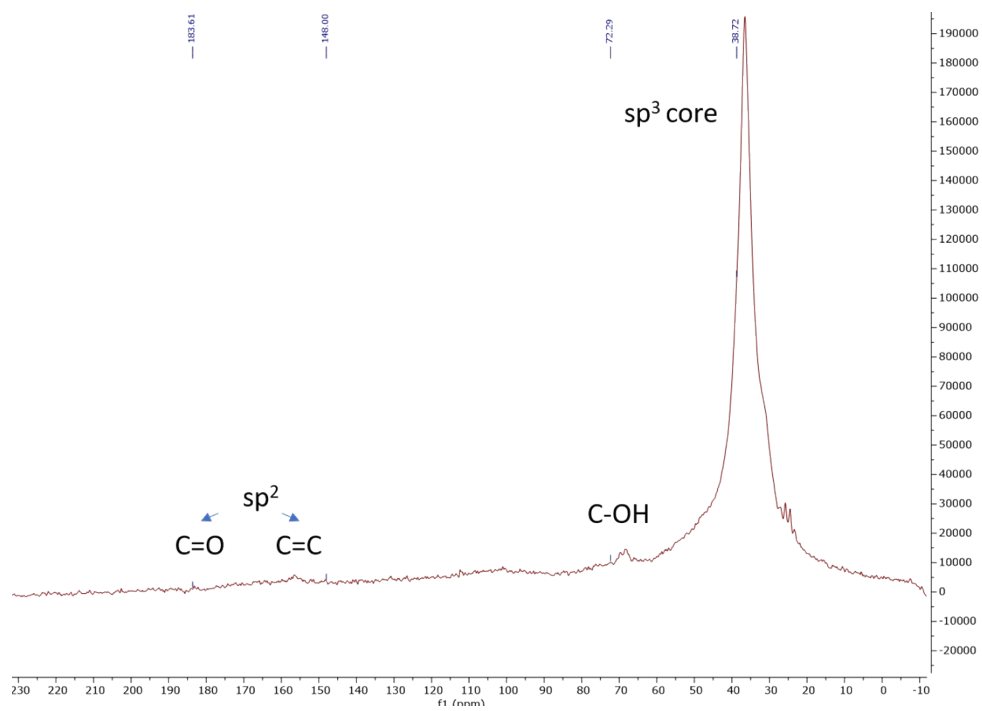

B)

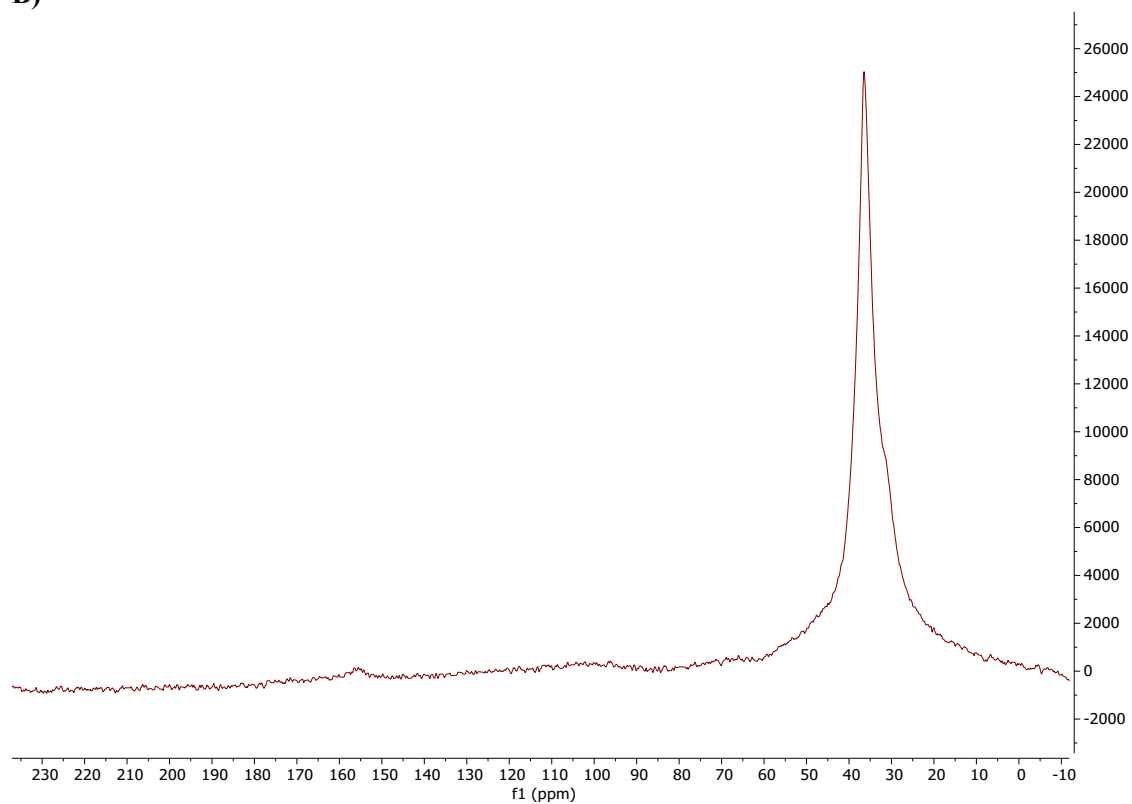

**Figure S2.**  $^{13}\text{C}$ -MAS NMR spectra of NDs\_COOH A) and NDs B).

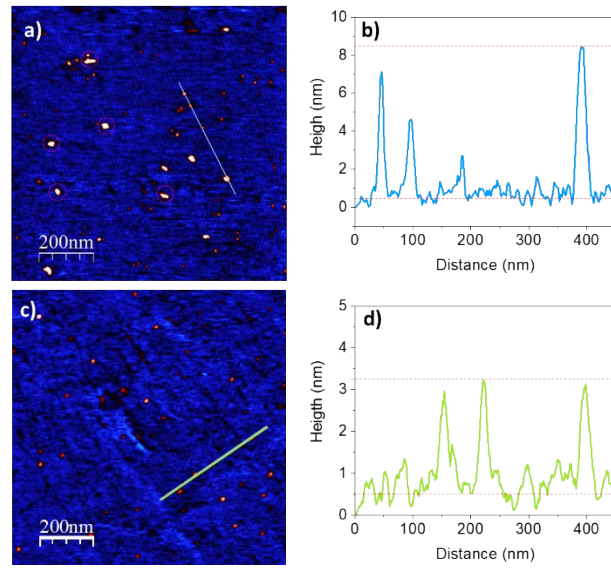

**Figure S3.** AFM topographic images of NDs\_COOH a) and NDs\_C<sub>2</sub> c). Cross-section of AFM images b) and d).

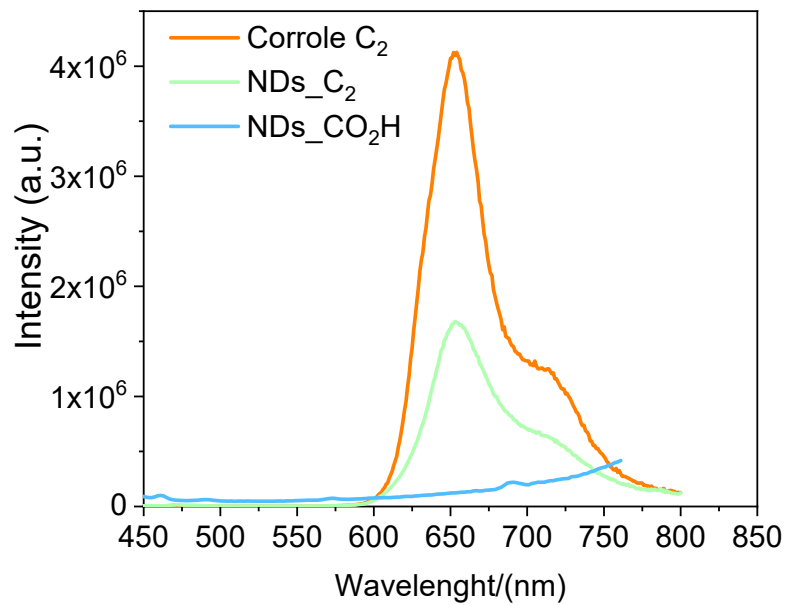

**Figure S4.** Emission spectra of the hybrid material and their precursors when excited at 420 nm at 298 K.

Acquisition Parameter

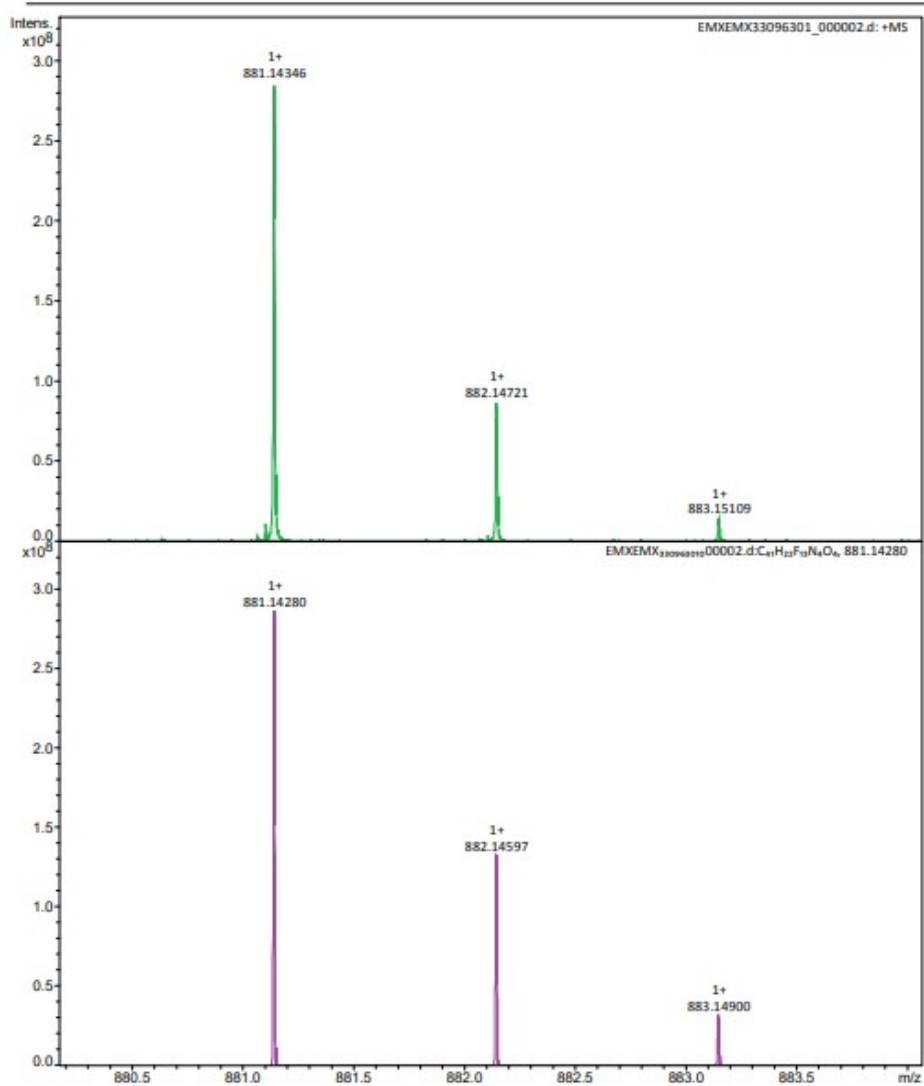

Mass Spectrum Molecular Formula Report

| Meas. m/z  | # | Ion Formula                                                                   | Score  | m/z        | err [ppm] | Mean err [ppm] | mSigma | rdB  | e <sup>-</sup> Conf | N-Rule |
|------------|---|-------------------------------------------------------------------------------|--------|------------|-----------|----------------|--------|------|---------------------|--------|
| 881.143458 | 1 | C <sub>39</sub> H <sub>19</sub> F <sub>14</sub> N <sub>8</sub> O              | 62.36  | 881.145278 | 2.1       | 1.2            | 78.6   | 28.0 | even                | ok     |
|            | 2 | C <sub>41</sub> H <sub>22</sub> F <sub>13</sub> N <sub>4</sub> O <sub>4</sub> | 100.00 | 881.142798 | -0.7      | -1.1           | 84.5   | 27.0 | even                | ok     |
|            | 3 | C <sub>42</sub> H <sub>18</sub> F <sub>13</sub> N <sub>8</sub>                | 60.25  | 881.144135 | 0.8       | 0.1            | 95.8   | 32.0 | even                | ok     |
|            | 4 | C <sub>44</sub> H <sub>21</sub> F <sub>12</sub> N <sub>4</sub> O <sub>3</sub> | 22.72  | 881.141655 | -2.0      | -2.2           | 101.8  | 31.0 | even                | ok     |

Figure S5. ESI mass spectrum of corrole C<sub>2</sub>.

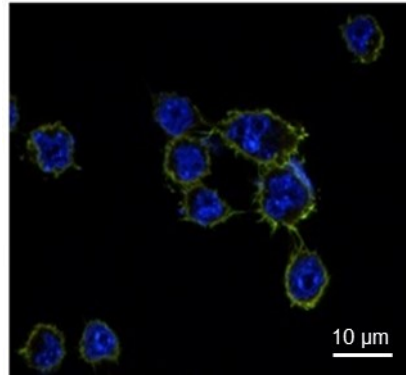

**Figure S6.** Morphology evaluation by confocal microscopy of RAW-264.7 macrophages after 24 h of culture in absence of nanomaterials. Cells were stained with DAPI for the visualization of the cell nuclei in blue and Alexa Fluor 488-Phalloidin for the visualization of cytoplasmic F-actin filaments in green.
